# Supplementary material for: Adapting crowdsourced clinical cancer curation in CIViC to the ClinGen minimum variant level data community‐driven standards
Source: PubMed Central journal article supplement (PMC6282863; doi:10.1002/humu.23651), 2018-10-11
Supplement: HUMU-39-1721-s007.pdf [file HUMU-39-1721-s007.pdf]

Fig. S1a

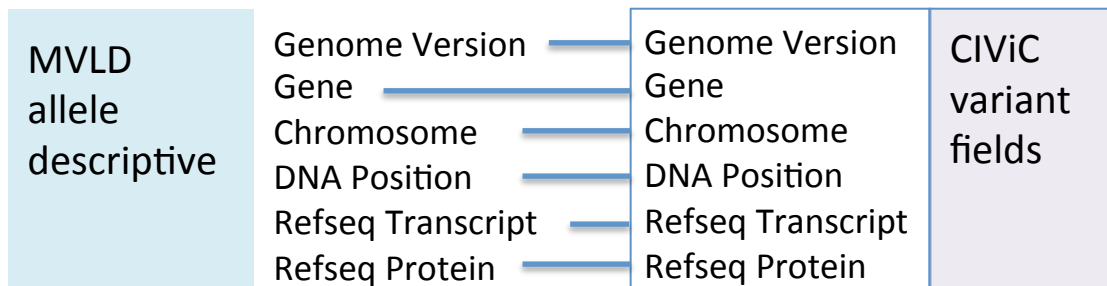

Fig. S1b

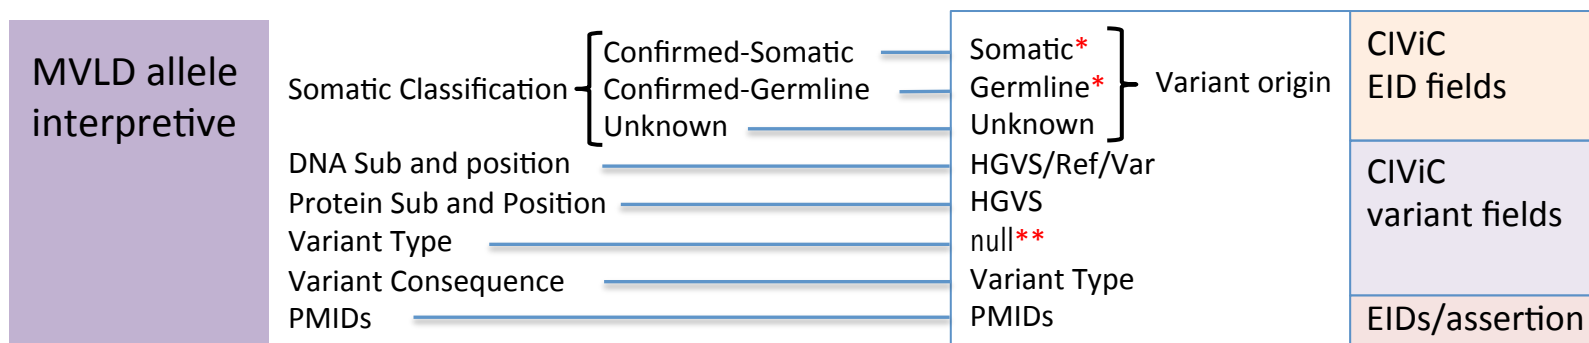

\* If MVLD variant is confirmed-somatic, then choose somatic in CIViC EID, and note confirmed somatic in EID evidence statement.

\*\* MVLD Variant Type (SNV, Insertion, Deletion) is inferred from the CIViC Variant Type field, drawn from the Sequence Ontology

Fig. S1c

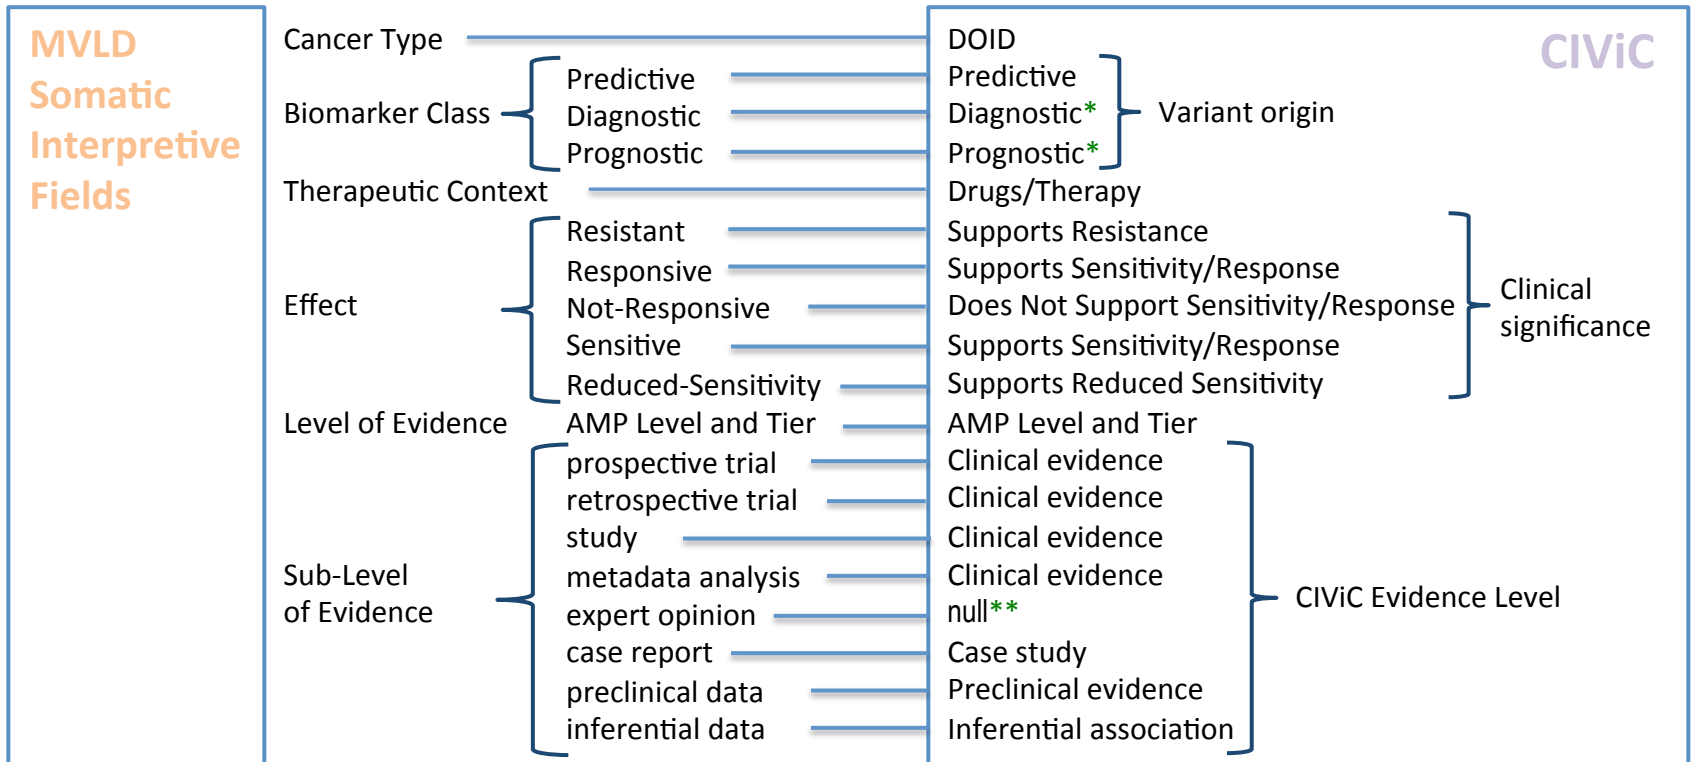

\*Diagnostic and Prognostic fields in CIViC require evidence direction, while MVLD is free text.

\*\*MVLD variants based on expert opinion are currently not supported by CIViC, which requires Pubmed ID.

Fig. S2a

| <b>Clinvar Field</b>   | <b>Column</b> |   | <b>CIViC Variant Field</b> |
|------------------------|---------------|---|----------------------------|
| Reference sequence     | D             | ← | ensembl transcript         |
| HGVS                   | E             | ← | HGVS                       |
| Chromosome             | F             | ← | Chr                        |
| Start                  | G             | ← | Start                      |
| Stop                   | H             | ← | Stop                       |
| Reference allele       | I             | ← | ref                        |
| Alternate allele       | J             | ← | var                        |
| Variation identifiers  | X             | ← | variant pub data IDs       |
| Alternate designations | Z             | ← | variant name Aliases       |
| URL                    | AB            | ← | variant URL                |

Fig. S2b

**Clinvar Field**

##Local ID  
Gene symbol  
Condition ID type  
Condition ID value  
Preferred condition name  
Clinical significance citations  
Citations or URLs for clinical significance without database identifiers  
Comment on clinical significance  
Explanation if clinical significance is other or drug response

**Column**

A  
C  
AD  
AE  
AF  
AP  
AQ  
AR  
AS

**CIViC Assertion Field**

AID  
Gene  
*if assertion has HPO: HPO*  
*if assertion has HPO: HPO IDs*  
DOID term  
PMID list  
EID URL list  
Assertion Summary. Statement  
Direction and Significance  
*If assertion is predictive: Drug*

Fig. S2c

| Clinvar Field         | Column | Entry Produced Based on CIViC Fields                                                                            |
|-----------------------|--------|-----------------------------------------------------------------------------------------------------------------|
| Condition comment     | AI     | <i>optional text giving detail for condition</i>                                                                |
| Clinical significance | AK     | <i>If assertion is predictive: Drug Response</i><br><i>else if assertion is diagnostic or prognostic: Other</i> |
| Collection method     | AX     | literature only                                                                                                 |
| Allele origin         | AY     | somatic                                                                                                         |
| Affected status       | AZ     | unknown                                                                                                         |
| Comment               | CO     | AMP Tier and Level; comment on CIViC                                                                            |
| Private comment       | CP     | private comment                                                                                                 |
| ClinVarAccession      | CQ     | Unique Submission Identifier                                                                                    |

purple text indicates CIViC field  
 blue text indicates a string to be entered into ClinVar field  
*italicized text* indicates logic implemented by submission protocol  
 orange text indicates optional text entered as parameters when running submission protocol  
 green text indicates unique submission ID

-  Entry is a direct submission of CIViC field or text
-  Entry requires logic based on fields from CIViC assertion

### Figure S3

| ClinVar Field                                                            | CIViC data example from AID5                                                                                                                                                                                                                                                                                                                                                                                                                                                                                                                                                                                                                                                                                                                                                                                                                                                                                                                                                                                                                                                                                                                                                                                                                                                                                                                                                            |
|--------------------------------------------------------------------------|-----------------------------------------------------------------------------------------------------------------------------------------------------------------------------------------------------------------------------------------------------------------------------------------------------------------------------------------------------------------------------------------------------------------------------------------------------------------------------------------------------------------------------------------------------------------------------------------------------------------------------------------------------------------------------------------------------------------------------------------------------------------------------------------------------------------------------------------------------------------------------------------------------------------------------------------------------------------------------------------------------------------------------------------------------------------------------------------------------------------------------------------------------------------------------------------------------------------------------------------------------------------------------------------------------------------------------------------------------------------------------------------|
| Reference sequence                                                       | NM_005228.4                                                                                                                                                                                                                                                                                                                                                                                                                                                                                                                                                                                                                                                                                                                                                                                                                                                                                                                                                                                                                                                                                                                                                                                                                                                                                                                                                                             |
| HGVS                                                                     | NC_000007.13:g.55259515T>G,NM_005228.4:c.2573T>G,ENST00000275493.2:c.2573T>G,NP_005219.2:p.Leu858Arg                                                                                                                                                                                                                                                                                                                                                                                                                                                                                                                                                                                                                                                                                                                                                                                                                                                                                                                                                                                                                                                                                                                                                                                                                                                                                    |
| Chromosome                                                               | 7                                                                                                                                                                                                                                                                                                                                                                                                                                                                                                                                                                                                                                                                                                                                                                                                                                                                                                                                                                                                                                                                                                                                                                                                                                                                                                                                                                                       |
| Start                                                                    | 55259515                                                                                                                                                                                                                                                                                                                                                                                                                                                                                                                                                                                                                                                                                                                                                                                                                                                                                                                                                                                                                                                                                                                                                                                                                                                                                                                                                                                |
| Stop                                                                     | 55259515                                                                                                                                                                                                                                                                                                                                                                                                                                                                                                                                                                                                                                                                                                                                                                                                                                                                                                                                                                                                                                                                                                                                                                                                                                                                                                                                                                                |
| Reference allele                                                         | T                                                                                                                                                                                                                                                                                                                                                                                                                                                                                                                                                                                                                                                                                                                                                                                                                                                                                                                                                                                                                                                                                                                                                                                                                                                                                                                                                                                       |
| Alternate allele                                                         | G                                                                                                                                                                                                                                                                                                                                                                                                                                                                                                                                                                                                                                                                                                                                                                                                                                                                                                                                                                                                                                                                                                                                                                                                                                                                                                                                                                                       |
| Variation identifiers                                                    | dbSNP:rs121434568; COSMIC:COSM6224; ClinVar:16609                                                                                                                                                                                                                                                                                                                                                                                                                                                                                                                                                                                                                                                                                                                                                                                                                                                                                                                                                                                                                                                                                                                                                                                                                                                                                                                                       |
| Alternate designations                                                   | LEU858ARG; RS121434568                                                                                                                                                                                                                                                                                                                                                                                                                                                                                                                                                                                                                                                                                                                                                                                                                                                                                                                                                                                                                                                                                                                                                                                                                                                                                                                                                                  |
| URL                                                                      | <a href="https://civicdb.org/events/genes/19/summary/variants/33/summary">https://civicdb.org/events/genes/19/summary/variants/33/summary</a>                                                                                                                                                                                                                                                                                                                                                                                                                                                                                                                                                                                                                                                                                                                                                                                                                                                                                                                                                                                                                                                                                                                                                                                                                                           |
| ##Local ID                                                               | AID5                                                                                                                                                                                                                                                                                                                                                                                                                                                                                                                                                                                                                                                                                                                                                                                                                                                                                                                                                                                                                                                                                                                                                                                                                                                                                                                                                                                    |
| Gene symbol                                                              | EGFR                                                                                                                                                                                                                                                                                                                                                                                                                                                                                                                                                                                                                                                                                                                                                                                                                                                                                                                                                                                                                                                                                                                                                                                                                                                                                                                                                                                    |
| Condition ID type                                                        | -                                                                                                                                                                                                                                                                                                                                                                                                                                                                                                                                                                                                                                                                                                                                                                                                                                                                                                                                                                                                                                                                                                                                                                                                                                                                                                                                                                                       |
| Condition ID value                                                       | -                                                                                                                                                                                                                                                                                                                                                                                                                                                                                                                                                                                                                                                                                                                                                                                                                                                                                                                                                                                                                                                                                                                                                                                                                                                                                                                                                                                       |
| Preferred condition name                                                 | non-small cell lung carcinoma (DOID:3908)                                                                                                                                                                                                                                                                                                                                                                                                                                                                                                                                                                                                                                                                                                                                                                                                                                                                                                                                                                                                                                                                                                                                                                                                                                                                                                                                               |
| Clinical significance citations                                          | PMID:24868098;PMID:18509184;PMID:20038723;PMID:24893891;PMID:15329413;PMID:19147750;PMID:22370314;PMID:24736073;PMID:27102076;PMID:27032107;PMID:21132006;PMID:17877814;PMID:22285168;PMID:24868098                                                                                                                                                                                                                                                                                                                                                                                                                                                                                                                                                                                                                                                                                                                                                                                                                                                                                                                                                                                                                                                                                                                                                                                     |
| Citations or URLs for clinical significance without database identifiers | <a href="https://civicdb.org/links/evidence/276">https://civicdb.org/links/evidence/276</a>   <a href="https://civicdb.org/links/evidence/1665">https://civicdb.org/links/evidence/1665</a>   <a href="https://civicdb.org/links/evidence/2621">https://civicdb.org/links/evidence/2621</a>   <a href="https://civicdb.org/links/evidence/2625">https://civicdb.org/links/evidence/2625</a>   <a href="https://civicdb.org/links/evidence/2624">https://civicdb.org/links/evidence/2624</a>   <a href="https://civicdb.org/links/evidence/3811">https://civicdb.org/links/evidence/3811</a>   <a href="https://civicdb.org/links/evidence/2634">https://civicdb.org/links/evidence/2634</a>   <a href="https://civicdb.org/links/evidence/229">https://civicdb.org/links/evidence/229</a>   <a href="https://civicdb.org/links/evidence/4291">https://civicdb.org/links/evidence/4291</a>   <a href="https://civicdb.org/links/evidence/4290">https://civicdb.org/links/evidence/4290</a>   <a href="https://civicdb.org/links/evidence/4285">https://civicdb.org/links/evidence/4285</a>   <a href="https://civicdb.org/links/evidence/4265">https://civicdb.org/links/evidence/4265</a>   <a href="https://civicdb.org/links/evidence/885">https://civicdb.org/links/evidence/885</a>   <a href="https://civicdb.org/links/evidence/2994">https://civicdb.org/links/evidence/2994</a> |
| Comment on clinical significance                                         | Non-small cell lung cancer with EGFR L858R mutation is sensitive to erlotinib or gefitinib. L858R is among the most common sensitizing EGFR mutations in NSCLC, and is assessed via DNA mutational analysis including Sanger sequencing and next generation sequencing methods. Tyrosine kinase inhibitors erlotinib and gefitinib are associated with improved progression free survival over chemotherapy in EGFR L858R patients. NCCN guidelines recommend (category 1) erlotinib and gefitinib for NSCLC with sensitizing EGFR mutations, along with afatinib and osimertinib.                                                                                                                                                                                                                                                                                                                                                                                                                                                                                                                                                                                                                                                                                                                                                                                                      |
| Explanation if clinical significance is other or drug response           | Supports Sensitivity/Response; Drugs: Erlotinib and Gefitinib                                                                                                                                                                                                                                                                                                                                                                                                                                                                                                                                                                                                                                                                                                                                                                                                                                                                                                                                                                                                                                                                                                                                                                                                                                                                                                                           |
| Condition comment                                                        | -                                                                                                                                                                                                                                                                                                                                                                                                                                                                                                                                                                                                                                                                                                                                                                                                                                                                                                                                                                                                                                                                                                                                                                                                                                                                                                                                                                                       |
| Clinical significance                                                    | Drug Response                                                                                                                                                                                                                                                                                                                                                                                                                                                                                                                                                                                                                                                                                                                                                                                                                                                                                                                                                                                                                                                                                                                                                                                                                                                                                                                                                                           |
| Collection method                                                        | literature only                                                                                                                                                                                                                                                                                                                                                                                                                                                                                                                                                                                                                                                                                                                                                                                                                                                                                                                                                                                                                                                                                                                                                                                                                                                                                                                                                                         |
| Allele origin                                                            | somatic                                                                                                                                                                                                                                                                                                                                                                                                                                                                                                                                                                                                                                                                                                                                                                                                                                                                                                                                                                                                                                                                                                                                                                                                                                                                                                                                                                                 |
| Affected status                                                          | unknown                                                                                                                                                                                                                                                                                                                                                                                                                                                                                                                                                                                                                                                                                                                                                                                                                                                                                                                                                                                                                                                                                                                                                                                                                                                                                                                                                                                 |
| Comment                                                                  | Tier I Level A                                                                                                                                                                                                                                                                                                                                                                                                                                                                                                                                                                                                                                                                                                                                                                                                                                                                                                                                                                                                                                                                                                                                                                                                                                                                                                                                                                          |
| Private comment                                                          | -                                                                                                                                                                                                                                                                                                                                                                                                                                                                                                                                                                                                                                                                                                                                                                                                                                                                                                                                                                                                                                                                                                                                                                                                                                                                                                                                                                                       |
| ClinVarAccession                                                         | TBD                                                                                                                                                                                                                                                                                                                                                                                                                                                                                                                                                                                                                                                                                                                                                                                                                                                                                                                                                                                                                                                                                                                                                                                                                                                                                                                                                                                     |
